# Supplementary material for: Proteomic identification of galectin-11 and 14 ligands from Haemonchus contortus
Source: PeerJ journal article supplement (doi:10.7717/peerj.4510), 2018-03-19
Supplement: Supplementary_Fig._S1.pdf [file Supplementary_Fig._S1.pdf]

Bait production

NHS-Activated Agarose

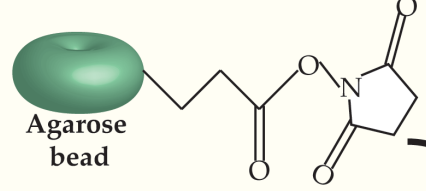

Recombinant LGALS-11 or LGALS-14

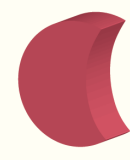

NHS Coupling

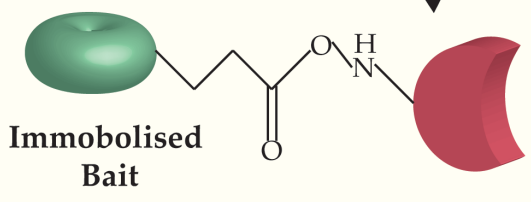

*H. contortus* lysate

Larvae (L4)

Adult

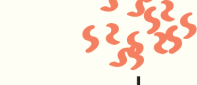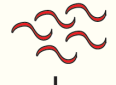

Sonication

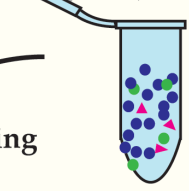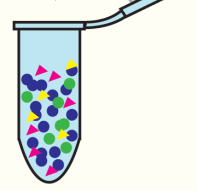

Clear lysate

Prey production

Binding

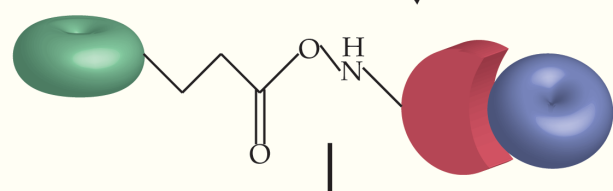

Washing

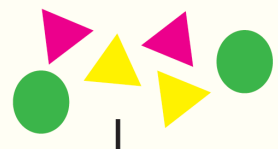

Elution

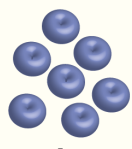

Pull-down assay

Analysis

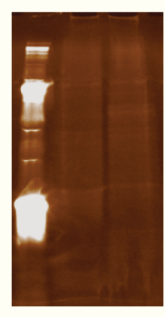

SDS-PAGE

Analysis

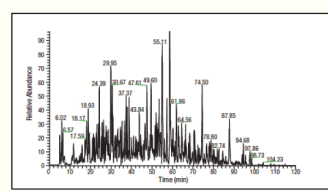

LC-MS/MS  
Mass spectrometry

Mascot & Proteome  
analysis
