# Supplementary material for: Proteomic identification of galectin-11 and 14 ligands from Haemonchus contortus
Source: PeerJ. 2018 Mar 19;6:e4510. doi: 10.7717/peerj.4510 (PMC5863708; doi:10.7717/peerj.4510)
Supplement: Table S1 [file peerj-06-4510-s001.xlsx]

## Sheet: Sheet1
Accession	Description	LGALS-11_L4	LGALS-11_Adult	LGALS-14_L4	LGALS-14_Adult	Control_L4	Control_Adult	Coverage	# Peptides	# PSMs	# Unique Peptides	# Protein Groups	# AAs	MW [kDa]	calc. pI	Biological Process	Cellular Component	Molecular Function	Pfam IDs	GO Accessions
W6NGS2	Peptidase S28 domain containing protein OS=Haemonchus contortus GN=HCOI_01624100 PE=4 SV=1	YES	YES	YES	YES	YES	YES	41.5913	42	1169	39	1	1106	125.337	6.18	metabolic process	membrane	catalytic activity	Pf00561, Pf05577, Pf12697	[GO:0006508]; GO:0019538; GO:0043170; GO:0044238; GO:0071704; GO:0008152; GO:0008150; [GO:0008236]; GO:0017171; GO:0070011; GO:0016787; GO:0008233; GO:0003824; GO:0003674; [GO:0016020]; GO:0005575; [GO:0016021]; GO:0031224; GO:0044425; GO:0005575; GO:0016020
W6NR97	Actin actin domain containing protein OS=Haemonchus contortus GN=HCOI_01138100 PE=3 SV=1	YES	YES	YES	YES	YES	YES	28.8557	9	139	9	1	402	44.631	6.01	Cytoskeleton	membrane	nucleotide binding	Pf00022	[GO:0000166]; GO:0036094; GO:1901265; GO:0005488; GO:0097159; GO:1901363; GO:0003674; [GO:0005524]; GO:0032550; GO:0032559; GO:0035639; GO:0001883; GO:0032549; GO:0030554; GO:0032555; GO:0043168; GO:1901265; GO:0001882; GO:0017076; GO:0032553; GO:0043167; GO:0097159; GO:1901363; GO:0036094; GO:0097367; GO:0000166; GO:0005488; GO:0003674
W6NHT2	Peptidase A2A and RNA-directed DNA polymerase (Reverse transcriptase) domain containing protein (Fragment) OS=Haemonchus contortus GN=HCOI_02044200 PE=4 SV=1	Not Found	Not Found	Not Found	Not Found	YES	Not Found	3.49854	1	2	1	1	686	77.232	9.01	metabolic process	nucleus	catalytic activity;metal ion binding	Pf00077, Pf00078, Pf13650, Pf13975	[GO:0003676]; GO:0097159; GO:1901363; GO:0005488; GO:0003674; [GO:0003964]; GO:0034061; GO:0016779; GO:0016772; GO:0016740; GO:0003824; GO:0003674; [GO:0004190]; GO:0004175; GO:0070001; GO:0070011; GO:0008233; GO:0016787; GO:0003824; GO:0003674; [GO:0006278]; GO:0006260; GO:0006259; GO:0034645; GO:0044260; GO:0090304; GO:0009059; GO:0044249; GO:0043170; GO:0044237; GO:0006139; GO:1901576; GO:0009…
